# Supplementary material
Source: publisher site journal article supplement (https://www.kjim.org/upload/media/kjim-2021-458-suppl4.pdf)
Supplement: Supplementary file 1 [file kjim-2021-458-suppl4.pdf]

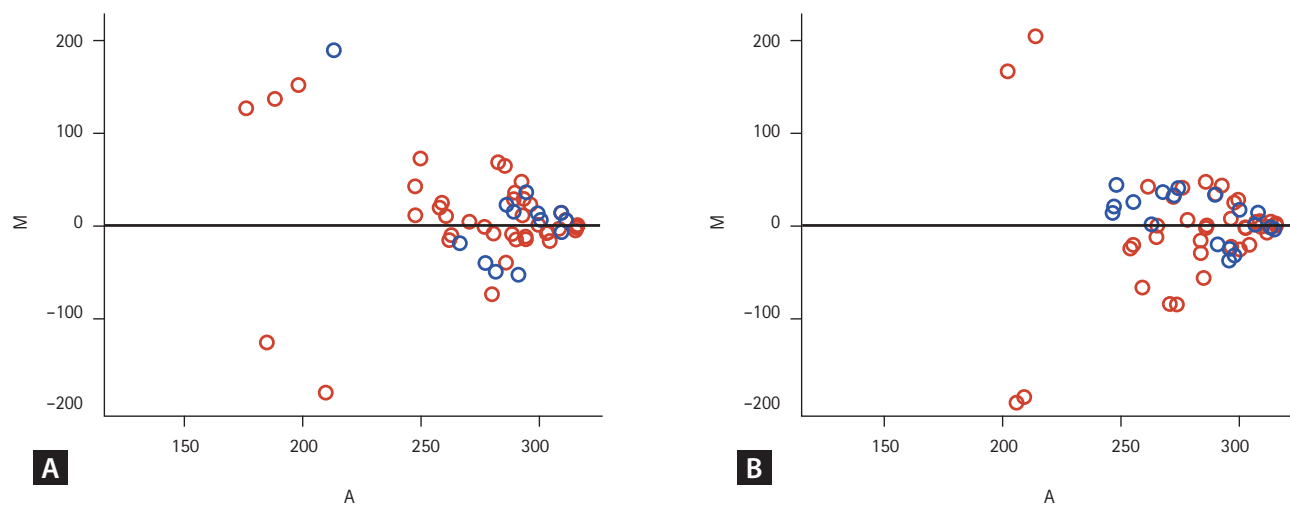

**Supplementary Figure 4.** MA plots of the rank values of the phylotype *Escherichia/Shigella*. M value is the difference between the rank values after and before treatment with either (A) *Escherichia coli* Nissle 1917 (EcN) or (B) placebo, while A value is the average of the rank values after and before treatment. The red and blue circles represent the samples shown response and no response, respectively.
